# Supplementary material for: The Dual-Targeted Fusion Inhibitor Clofazimine Binds to the S2 Segment of the SARS-CoV-2 Spike Protein
Source: Preprints.org preprint supplement (doi:10.20944/preprints202403.0096.v1), 2024-03-04
Supplement: Supplementary file 1 [file supplementary]

## **Supporting Information**

### **The Dual-Targeted Fusion Inhibitor Clofazimine Binds to the S2 Segment of the SARS-CoV-2 Spike Protein.**

Matthew R. Freidel,<sup>1</sup> Pratiti A. Vakhariya,<sup>1</sup>  
Shalinder K. Sardarni,<sup>1</sup> and Roger S. Armen<sup>1\*</sup>

<sup>1</sup>Department of Pharmaceutical Sciences, College of Pharmacy,  
Thomas Jefferson University, 901 Walnut St. Suite 918,  
Philadelphia, Pennsylvania, 19170.

\*Corresponding author, E-mail: [roger.armen@jefferson.edu](mailto:roger.armen@jefferson.edu)

**Figure S1. Consensus binding site for Clofazimine 2 on the Nsp13 Helicase.** (A) Ribbon structure of Nsp13 colored rainbow from the N-terminus in blue to the C-terminus in red where several domains are labeled. (B) Shown is the orientation of the REC2A and REC1B domains in orientation to the binding site where the molecular surface of 2 is shown. (C) A zoom-in view of the binding site from the same orientation showing the residues forming the binding site. (D) A similar view showing the orientation the RNA binding sites modeled from other helicases in the background.

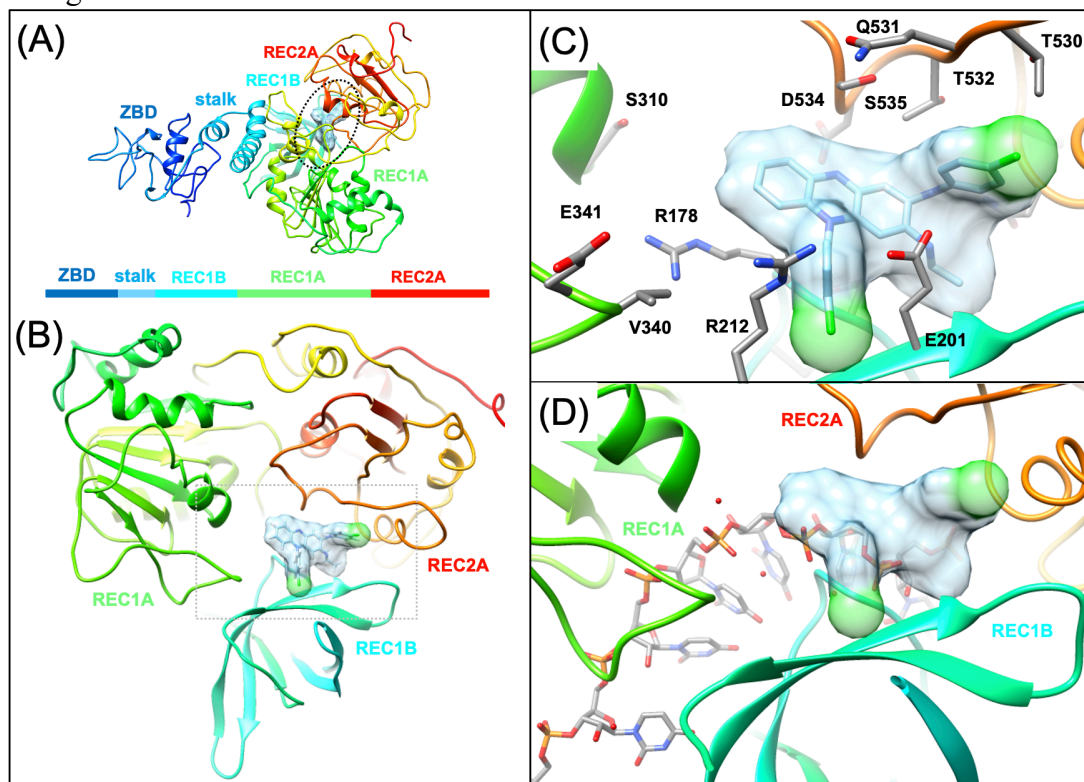

**Table S1.** Comparison of Clofazimine derivatives predicted binding free energy ( $\Delta G_{\text{bind}}$ ) at Site 1 and Site 2 to those approximated from experimental IC50 values. Predicted free energy of binding ( $\Delta G_{\text{bind}}$ ) in (kcal/mol) is calculated from a triplicate average (Avg) and standard deviation (Stdev) as described in methods.

|    | Compound   | Observed      | Observed   | Predicted      | Predicted        | Predicted      | Predicted        |
|----|------------|---------------|------------|----------------|------------------|----------------|------------------|
|    |            | EC50          | Calc.      | Site 2         | Site 2           | Site 1         | Site 1           |
|    | Deriv. ID  | $\mu\text{M}$ | $\Delta G$ | $\Delta G$ Avg | $\Delta G$ Stdev | $\Delta G$ Avg | $\Delta G$ Stdev |
|    |            |               | (kcal/mol) | (kcal/mol)     | (kcal/mol)       | (kcal/mol)     | (kcal/mol)       |
| 1  | <b>1</b>   | 10.0          | -6.82      | -9.06          | 0.16             | -7.25          | 0.13             |
| 2  | <b>6d</b>  | 154.0         | -5.20      | -8.71          | 0.10             | -7.03          | 0.25             |
| 3  | <b>6e</b>  | 16.1          | -6.54      | -9.79          | 0.48             | -7.46          | 0.33             |
| 4  | <b>7a</b>  | 141.0         | -5.25      | -8.70          | 0.08             | -7.34          | 0.50             |
| 5  | <b>7b</b>  | 39.3          | -6.01      | -8.60          | 0.08             | -7.38          | 0.11             |
| 6  | <b>7c</b>  | 40.9          | -5.98      | -8.69          | 0.19             | -6.78          | 0.07             |
| 7  | <b>7d</b>  | 14.5          | -6.60      | -9.14          | 0.22             | -7.02          | 0.14             |
| 8  | <b>7e</b>  | 13.5          | -6.64      | -9.00          | 0.07             | -6.74          | 0.15             |
| 9  | <b>7f</b>  | 10.3          | -6.80      | -8.95          | 0.17             | -6.84          | 0.23             |
| 10 | <b>7g</b>  | 16.6          | -6.52      | -9.56          | 0.14             | -7.51          | 0.16             |
| 11 | <b>7i</b>  | 10.0          | -6.82      | -9.47          | 0.23             | -7.65          | 0.21             |
| 12 | <b>7k</b>  | 12.4          | -6.69      | -10.0          | 0.23             | -7.75          | 0.23             |
| 13 | <b>7m</b>  | 17.2          | -6.50      | -8.61          | 0.04             | -6.68          | 0.12             |
| 14 | <b>7o</b>  | 13.5          | -6.64      | -9.32          | 0.01             | -7.19          | 0.05             |
| 15 | <b>15a</b> | 29.6          | -6.17      | -8.66          | 0.29             | -6.97          | 0.21             |
| 16 | <b>15b</b> | 81.1          | -5.58      | -8.75          | 0.17             | -7.11          | 0.03             |
| 17 | <b>15f</b> | 14.6          | -6.59      | -8.89          | 0.09             | -7.34          | 0.15             |
| 18 | <b>15g</b> | 10.0          | -6.82      | -8.89          | 0.22             | -7.49          | 0.41             |
| 19 | <b>15h</b> | 33.1          | -6.11      | -8.25          | 0.13             | -7.30          | 0.08             |
